# Supplementary material for: Biomass allocation, carbon content change and carbon stock distribution of Scots pine (Pinus sylvestris var. mongholica) plantation forests at different stand ages and densities in the sandy area of western Liaoning Province, China
Source: PeerJ. 2025 Apr 4;13:e19232. doi: 10.7717/peerj.19232 (PMC11974518; doi:10.7717/peerj.19232)
Supplement: Supplemental Information 1 [file peerj-13-19232-s001.xlsx]

## Sheet: Sample plot survey data
Sample plot	Number	age(a)	Stand density(tree*hm-2)	Branch height (cm)	DBH(cm)	Tree height(cm)	Crown width north-south(cm)	Eastern and Western Crown(cm)	Average crown width(cm)				Sample plot	Number	age(a)	Stand density(tree*hm-2)	Branch height (cm)	DBH(cm)	Tree height(cm)	Crown width north-south(cm)	Eastern and Western Crown(cm)	Average crown width(cm)
YS①	1	9	483.333	26	5.87	260	211	290	250.5				MS HD ①	1	41	1216.67	800	19	1400	256	464	360
	2	9	483.333	37	5.22	265	251	235	243					2	41	1216.67	890	23.48	1490	246	494	370
	3	9	483.333	32	3.68	222	182	207	194.5					3	41	1216.67	880	18.1	1400	267	276	271.5
	4	9	483.333	25	3.23	238	190	195	192.5					4	41	1216.67	860	23.07	1420	246	469	357.5
	5	9	483.333	24	6.03	272	232	291	261.5					5	41	1216.67	830	13.38	1210	222	326	274
	6	9	483.333	34	5.88	220	309	281	295					6	41	1216.67	810	18.68	1230	445	302	373.5
	7	9	483.333	26	5.49	282	223	247	235					7	41	1216.67	1010	18.38	1420	202	273	237.5
	8	9	483.333	31	5.68	210	239	266	252.5					8	41	1216.67	750	23.27	1430	416	399	407.5
	9	9	483.333	30	4.4	245	227	231	229					9	41	1216.67	980	19.58	1210	274	318	296
	10	9	483.333	29	5	256	291	154	222.5					10	41	1216.67	1010	12.98	1200	148	368	258
	11	9	483.333	28	3.52	218	132	134	133					11	41	1216.67	790	21.57	1300	353	478	415.5
	12	9	483.333	23	7.5	265	345	367	356					12	41	1216.67	1040	14.98	1320	253	281	267
	13	9	483.333	48	3	158	166	193	179.5					13	41	1216.67	910	15.78	1210	319	274	296.5
	14	9	483.333	23	4.43	242	193	124	158.5					14	41	1216.67	1050	16.96	1420	290	389	339.5
	15	9	483.333	46	3.45	217	145	159	152					15	41	1216.67	920	17.95	1410	302	456	379
	16	9	483.333	25	4.48	224	205	192	198.5					16	41	1216.67	800	17.42	1380	351	314	332.5
	17	9	483.333	32	5.33	266	310	282	296					17	41	1216.67	640	20.31	1420	303	381	342
	18	9	483.333	34	4.04	211	217	178	197.5					18	41	1216.67	800	11.32	1010	271	220	245.5
	19	9	483.333	52	3.22	211	182	187	184.5					19	41	1216.67	900	19.55	1430	351	334	342.5
	20	9	483.333	38	4.1	215	190	201	195.5					20	41	1216.67	710	19.18	1380	251	449	350
	21	9	483.333	52	5.37	257	193	240	216.5					21	41	1216.67	980	22.03	1410	402	435	418.5
	22	9	483.333	48	8.17	342	304	322	313					22	41	1216.67	780	20.03	1260	351	384	367.5
	23	9	483.333	52	3.74	241	235	217	226					23	41	1216.67	840	18.5	1100	306	356	331
	24	9	483.333	25	3.18	213	271	291	281					24	41	1216.67	920	14.35	1100	181	230	205.5
	25	9	483.333	39	5.28	238	198	218	208					25	41	1216.67	660	13.75	1030	314	292	303
	26	9	483.333	26	4.23	198	206	261	233.5					26	41	1216.67	810	17.92	1020	315	303	309
	27	9	483.333	36	4.38	244	207	231	219					27	41	1216.67	910	15.65	1280	241	283	262
	28	9	483.333	33	3.05	172	185	163	174					28	41	1216.67	820	18.75	1270	305	342	323.5
	29	9	483.333	36	2.05	178	163	132	147.5					29	41	1216.67	830	15.28	1380	306	167	236.5
	Average value	9	483.333	34.1379	4.58621	233.793	220.759	223.759	222.259					30	41	1216.67	800	21.85	1080	475	512	493.5
														31	41	1216.67	850	15.83	1170	192	392	292
														32	41	1216.67	1020	12.13	1210	120	355	237.5
														33	41	1216.67	830	24.78	1410	507	513	510
														34	41	1216.67	980	14.88	1240	189	271	230
Sample plot	Number	age(a)	Stand density(tree*hm-2)	Branch height (cm)	DBH(cm)	Tree height(cm)	Crown width north-south(cm)	Eastern and Western Crown(cm)	Average crown width(cm)					35	41	1216.67	980	17.56	1380	223	315	269
YS②	1	9	550	25	2.63	195	186	243	214.5					36	41	1216.67	840	17.89	1260	310	403	356.5
	2	9	550	46	1.66	179	178	180	179					37	41	1216.67	830	12.52	1170	199	245	222
	3	9	550	39	4.92	251	220	120	170					38	41	1216.67	1000	17.4	1340	231	330	280.5
	4	9	550	64	3.98	252	233	205	219					39	41	1216.67	1180	15.52	1410	225	234	229.5
	5	9	550	24	4.94	277	181	186	183.5					40	41	1216.67	810	20.8	1240	362	341	351.5
	6	9	550	33	5.48	282	198	195	196.5					41	41	1216.67	810	19.63	1210	264	435	349.5
	7	9	550	34	4.87	273	163	146	154.5					42	41	1216.67	840	13.95	1180	215	273	244
	8	9	550	26	4.43	265	243	195	219					43	41	1216.67	910	18.14	1110	323	352	337.5
	9	9	550	36	4.48	197	129	147	138					44	41	1216.67	800	16.3	1050	224	383	303.5
	10	9	550	37	4.13	244	170	165	167.5					45	41	1216.67	850	16.1	1020	325	417	371
	11	9	550	37	5.15	199	163	189	176					46	41	1216.67	760	13.32	1080	209	253	231
	12	9	550	44	3.72	197	146	123	134.5					47	41	1216.67	720	16.68	1040	406	315	360.5
	13	9	550	48	4.77	274	187	205	196					48	41	1216.67	620	13.32	840	239	254	246.5
	14	9	550	31	4.68	264	204	215	209.5					49	41	1216.67	640	23.06	1280	327	485	406
	15	9	550	37	4.53	204	224	206	215					50	41	1216.67	600	17.33	1270	287	495	391
	16	9	550	23	5.01	265	175	178	176.5					51	41	1216.67	800	14.93	1150	368	339	353.5
	17	9	550	27	5.25	261	179	182	180.5					52	41	1216.67	450	17.87	1120	394	522	458
	18	9	550	39	3.5	273	246	217	231.5					53	41	1216.67	630	17.18	1110	275	451	363
	19	9	550	22	4.64	236	212	191	201.5					54	41	1216.67	640	20.28	1200	513	397	455
	20	9	550	35	5.02	219	207	217	212					55	41	1216.67	600	16.28	1020	343	315	329
	21	9	550	28	4.44	252	226	227	226.5					56	41	1216.67	820	13.1	1210	187	260	223.5
	22	9	550	24	5.89	268	227	192	209.5					57	41	1216.67	720	19.52	1240	478	469	473.5
	23	9	550	31	8.57	373	287	305	296					58	41	1216.67	810	21.68	1450	449	423	436
	24	9	550	32	3.13	196	165	272	218.5					59	41	1216.67	780	24.38	1400	423	317	370
	25	9	550	36	6.75	376	213	231	222					60	41	1216.67	620	18.54	1310	364	393	378.5
	26	9	550	31	7.14	274	292	234	263					61	41	1216.67	630	12.63	940	375	278	326.5
	27	9	550	43	1.62	146	119	116	117.5					62	41	1216.67	620	19.11	1250	435	418	426.5
	28	9	550	28	5.21	275	165	187	176					63	41	1216.67	760	19.32	1260	403	398	400.5
	29	9	550	46	1.86	198	207	161	184					64	41	1216.67	540	23.13	1210	435	682	558.5
	30	9	550	39	3.62	286	195	152	173.5					65	41	1216.67	630	24.1	1320	412	558	485
	31	9	550	43	4.1	244	243	282	262.5					66	41	1216.67	620	22.11	1330	437	418	427.5
	32	9	550	26	4.47	242	163	176	169.5					67	41	1216.67	820	18.88	1240	513	446	479.5
	33	9	550	28	4.63	248	234	205	219.5					68	41	1216.67	520	22.6	1320	723	618	670.5
	Average value	9	550	34.6061	4.52182	248.03	199.394	195.303	197.348					69	41	1216.67	580	26.32	1150	759	487	623
														70	41	1216.67	500	26.48	1240	505	578	541.5
														71	41	1216.67	780	25.43	1250	673	605	639
Sample plot	Number	age(a)	Stand density(tree*hm-2)	Branch height (cm)	DBH(cm)	Tree height(cm)	Crown width north-south(cm)	Eastern and Western Crown(cm)	Average crown width(cm)					72	41	1216.67	470	22.28	1200	397	596	496.5
YS③	1	9	550	44	3.72	197	146	123	134.5					73	41	1216.67	600	15.75	1120	296	395	345.5
	2	9	550	48	4.77	274	204	215	209.5					Average value	41	1216.67	788.219	18.3848	1240.68	335.562	383.466	359.514
	3	9	550	26	3.97	239	173	182	177.5
	4	9	550	44	5.68	282	226	224	225
	5	9	550	29	1.77	176	124	137	130.5				Sample plot	Number	age(a)	Stand density(tree*hm-2)	Branch height (cm)	DBH(cm)	Tree height(cm)	Crown width north-south(cm)	Eastern and Western Crown(cm)	Average crown width(cm)
	6	9	550	36	8.88	327	207	229	218				MS HD ②	1	41	1050	650	22.32	1320	556	504	530
	7	9	550	44	7.36	295	236	207	221.5					2	41	1050	590	23.26	1210	503	502	502.5
	8	9	550	23	6.04	316	254	206	230					3	41	1050	630	21.28	1290	473	519	496
	9	9	550	62	3.52	231	197	186	191.5					4	41	1050	630	24.22	1080	714	852	783
	10	9	550	36	2.65	187	181	175	178					5	41	1050	510	24.33	1060	452	593	522.5
	11	9	550	25	2.63	195	186	243	214.5					6	41	1050	590	26.08	1020	587	619	603
	12	9	550	46	1.66	178	178	179	178.5					7	41	1050	460	21.12	980	427	689	558
	13	9	550	39	5.61	285	229	204	216.5					8	41	1050	400	18.02	820	292	562	427
	14	9	550	61	4.68	192	203	160	181.5					9	41	1050	480	22.1	810	398	503	450.5
	15	9	550	25	4.35	266	174	212	193					10	41	1050	400	19.98	730	533	332	432.5
	16	9	550	33	4.42	250	239	214	226.5					11	41	1050	620	20.12	1020	533	403	468
	17	9	550	22	6.38	291	206	225	215.5					12	41	1050	740	13.49	890	263	210	236.5
	18	9	550	22	3.47	230	152	131	141.5					13	41	1050	630	20.75	1120	483	579	531
	19	9	550	28	5.65	300	202	174	188					14	41	1050	510	19.4	1050	397	250	323.5
	20	9	550	30	2.18	180	114	114	114					15	41	1050	840	24.58	1280	657	587	622
	21	9	550	24	5.12	284	190	191	190.5					16	41	1050	600	12.68	1000	152	181	166.5
	22	9	550	31	3.78	197	147	165	156					17	41	1050	640	19.49	1120	463	577	520
	23	9	550	27	6.43	309	232	274	253					18	41	1050	850	24.36	1270	457	477	467
	24	9	550	24	3.62	217	183	180	181.5					19	41	1050	640	18.8	1200	482	362	422
	25	9	550	33	4.91	262	235	249	242					20	41	1050	480	18.02	1050	455	357	406
	26	9	550	27	5.58	294	202	186	194					21	41	1050	880	23.18	1240	356	373	364.5
	27	9	550	33	5	283	207	164	185.5					22	41	1050	640	16.02	1100	283	386	334.5
	28	9	550	18	5.36	298	199	201	200					23	41	1050	520	25.77	1230	541	552	546.5
	29	9	550	29	4.77	169	132	181	156.5					24	41	1050	510	18.12	1010	492	470	481
	30	9	550	12	5.08	272	181	192	186.5					25	41	1050	710	17.67	1040	308	331	319.5
	31	9	550	19	3.18	208	232	211	221.5					26	41	1050	840	15.23	1250	321	275	298
	32	9	550	24	3.02	199	179	178	178.5					27	41	1050	620	21.13	1180	460	520	490
	33	9	550	13	4.88	236	196	181	188.5					28	41	1050	530	16.02	1050	369	394	381.5
	Average value	9	550	31.4242	4.54909	246.03	192.303	190.697	191.5					29	41	1050	680	16.45	1010	228	412	320
														30	41	1050	630	18.38	1120	310	454	382
														31	41	1050	650	17.43	1050	391	350	370.5
														32	41	1050	800	19.98	1010	331	276	303.5
														33	41	1050	440	19.08	880	537	382	459.5
Sample plot	Number	age(a)	Stand density(tree*hm-2)	Branch height (cm)	DBH(cm)	Tree height(cm)	Crown width north-south(cm)	Eastern and Western Crown(cm)	Average crown width(cm)					34	41	1050	440	20.42	1050	590	565	577.5
HMS①	1	22	588.333	27	8.2	515	187	314	250.5					35	41	1050	680	20.06	1200	482	496	489
	2	22	588.333	97.6	13.8	564	419	423	421					36	41	1050	730	13.98	1080	225	314	269.5
	3	22	588.333	50	11.2	467	321	498	409.5					37	41	1050	790	13.82	1170	298	273	285.5
	4	22	588.333	103.4	12.1	587	395	535	465					38	41	1050	710	11.37	1020	241	300	270.5
	5	22	588.333	104	18.2	552	311	590	450.5					39	41	1050	580	11.75	1110	183	215	199
	6	22	588.333	124	12.4	528	284	435	359.5					40	41	1050	780	15.78	1200	290	345	317.5
	7	22	588.333	73	11.6	506	307	478	392.5					41	41	1050	640	11.96	780	253	274	263.5
	8	22	588.333	85	13.7	534	319	557	438					42	41	1050	810	14.43	1030	285	353	319
	9	22	588.333	94	10.1	482	307	387	347					43	41	1050	680	14.86	980	229	290	259.5
	10	22	588.333	65	12.7	523	359	393	376					44	41	1050	620	12	1010	202	208	205
	11	22	588.333	69	9.5	464	282	364	323					45	41	1050	600	16.06	990	283	292	287.5
	12	22	588.333	98	11.7	513	288	376	332					46	41	1050	800	18.99	1030	381	365	373
	13	22	588.333	38	8.7	456	249	317	283					47	41	1050	650	16.18	1060	279	289	284
	14	22	588.333	61	9.6	426	273	302	287.5					48	41	1050	570	14.88	1060	505	165	335
	15	22	588.333	83.5	10	459	262	411	336.5					49	41	1050	640	18.79	920	437	492	464.5
	16	22	588.333	97.8	14.9	527	314	413	363.5					50	41	1050	640	22.38	1220	535	440	487.5
	17	22	588.333	27.7	10.3	533	283	332	307.5					51	41	1050	600	19.12	1230	523	489	506
	18	22	588.333	101.4	13.6	516	412	401	406.5					52	41	1050	480	15.33	850	342	499	420.5
	19	22	588.333	15	14.2	537	409	352	380.5					53	41	1050	510	16.25	1070	385	343	364
	20	22	588.333	11.9	9.7	396	295	304	299.5					54	41	1050	540	16.22	920	325	417	371
	21	22	588.333	92	13.7	525	342	324	333					55	41	1050	530	13.41	910	280	329	304.5
	22	22	588.333	66	9.3	447	290	290	290					56	41	1050	650	20.08	1200	403	394	398.5
	23	22	588.333	102	12.3	567	304	304	304					57	41	1050	730	13.57	1150	252	230	241
	24	22	588.333	5.6	10.2	405	298	298	298					Average value	41	1050	627.018	18.2553	1065.44	393.193	407.193	400.193
	25	22	588.333	40.3	13	560	423	423	423
	26	22	588.333	81	10.4	527	295	295	295
	27	22	588.333	96	12.6	539	305	305	305				Sample plot	Number	age(a)	Stand density(tree*hm-2)	Branch height (cm)	DBH(cm)	Tree height(cm)	Crown width north-south(cm)	Eastern and Western Crown(cm)	Average crown width(cm)
	28	22	588.333	85	10.3	431	236	236	236				MS HD ③	1	41	1016.67	720	15.24	1040	326	281	303.5
	29	22	588.333	57	10.2	517	298	298	298					2	41	1016.67	560	19.5	1170	413	442	427.5
	30	22	588.333	30	11.4	529	284	284	284					3	41	1016.67	560	18.38	1170	323	424	373.5
	31	22	588.333	86.7	11.4	424	198	198	198					4	41	1016.67	510	10.1	790	206	254	230
	32	22	588.333	71	7.4	413	203	203	203					5	41	1016.67	510	18.78	1180	341	409	375
	33	22	588.333	69	8.5	456	288	288	288					6	41	1016.67	680	13	950	249	322	285.5
	34	22	588.333	90.2	12.1	497	317	317	317					7	41	1016.67	820	9.63	920	270	180	225
	35	22	588.333	96.6	11.3	442	237	237	237					8	41	1016.67	560	17.28	1080	362	502	432
	Average value	22	588.333	71.2771	11.4371	496.114	302.686	356.629	329.657					9	41	1016.67	840	14.7	1110	305	290	297.5
														10	41	1016.67	620	9.84	990	125	240	182.5
														11	41	1016.67	620	9.83	980	189	182	185.5
Sample plot	Number	age(a)	Stand density(tree*hm-2)	Branch height (cm)	DBH(cm)	Tree height(cm)	Crown width north-south(cm)	Eastern and Western Crown(cm)	Average crown width(cm)					12	41	1016.67	682	10.75	1030	185	262	223.5
HMS②	1	22	622	67	12.5	445	292	458	375					13	41	1016.67	600	15.68	1080	291	311	301
	2	22	622	98	10.7	437	287	373	330					14	41	1016.67	790	16.68	1210	229	402	315.5
	3	22	622	73	10.2	430	237	408	322.5					15	41	1016.67	410	14.02	1040	336	291	313.5
	4	22	622	75	11.1	498	322	418	370					16	41	1016.67	710	8.58	900	207	240	223.5
	5	22	622	68	11.3	510	325	403	364					17	41	1016.67	640	13.06	1030	301	223	262
	6	22	622	88	12	562	264	425	344.5					18	41	1016.67	640	11.49	950	242	201	221.5
	7	22	622	91	12.2	518	313	422	367.5					19	41	1016.67	520	23.17	1340	525	473	499
	8	22	622	112	11.5	415	256	428	342					20	41	1016.67	620	16.72	1080	326	280	303
	9	22	622	87	12.7	498	265	484	374.5					21	41	1016.67	580	12.78	1100	239	215	227
	10	22	622	31	12	495	327	443	385					22	41	1016.67	630	15.12	1010	310	415	362.5
	11	22	622	96	14.8	537	279	422	350.5					23	41	1016.67	650	17.06	1190	298	321	309.5
	12	22	622	83.5	12.7	405	298	484	391					24	41	1016.67	690	16	1200	306	293	299.5
	13	22	622	62	12.6	574	248	429	338.5					25	41	1016.67	680	13.93	1230	295	322	308.5
	14	22	622	95	14	554	253	374	313.5					26	41	1016.67	510	19.35	1110	299	478	388.5
	15	22	622	79	12	449	27	434	230.5					27	41	1016.67	480	22.26	1020	564	491	527.5
	16	22	622	76	8.4	454	245	352	298.5					28	41	1016.67	780	17.4	1010	491	356	423.5
	17	22	622	85	14.8	528	293	392	342.5					29	41	1016.67	560	18.87	1110	526	413	469.5
	18	22	622	85	14.9	517	286	515	400.5					30	41	1016.67	720	15.23	1040	310	397	353.5
	19	22	622	105	10.4	401	218	351	284.5					31	41	1016.67	750	15.08	1180	343	200	271.5
	20	22	622	72	13.5	564	253	394	323.5					32	41	1016.67	800	15.16	1170	235	259	247
	21	22	622	62.8	9.9	423	317	354	335.5					33	41	1016.67	790	16.33	1260	209	279	244
	22	22	622	81	11.4	511	252	332	292					34	41	1016.67	650	13.1	1020	146	242	194
	23	22	622	92	12.9	564	295	345	320					35	41	1016.67	750	25.7	1380	505	462	483.5
	24	22	622	58	8.9	506	263	347	305					36	41	1016.67	600	19.69	1100	380	468	424
	25	22	622	86	11.1	571	283	299	291					37	41	1016.67	800	12.55	970	316	324	320
	26	22	622	88	12.3	593	279	412	345.5					38	41	1016.67	820	19.84	1400	342	421	381.5
	27	22	622	101	9.6	576	221	310	265.5					39	41	1016.67	780	18.34	1120	537	521	529
	28	22	622	81	11.3	564	379	455	417					40	41	1016.67	820	19.3	1200	418	423	420.5
	29	22	622	83	11.2	573	245	451	348					41	41	1016.67	682	14.48	1230	215	237	226
	30	22	622	112	9.1	485	233	312	272.5					42	41	1016.67	610	20.28	1080	400	395	397.5
	31	22	622	70	10.85	536	359	363	361					43	41	1016.67	470	17.48	920	385	300	342.5
	32	22	622	21	6.4	398	221	228	224.5					44	41	1016.67	550	18.28	1130	321	333	327
	33	22	622	39	13.2	564	303	373	338					45	41	1016.67	470	16.32	1120	403	298	350.5
	34	22	622	78	12.4	537	232	289	260.5					46	41	1016.67	780	17.2	1090	143	322	232.5
	35	22	622	95	10.5	529	245	301	273					47	41	1016.67	600	11.02	1030	264	278	271
	36	22	622	6	10.2	514	221	312	266.5					48	41	1016.67	710	22.03	1200	425	476	450.5
	37	22	622	11	12.2	531	253	361	307					49	41	1016.67	400	18.85	880	452	471	461.5
	38	22	622	8	14.6	545	249	408	328.5					50	41	1016.67	580	23.97	1210	520	502	511
	39	22	622	18	13	536	285	282	283.5					51	41	1016.67	560	12.63	750	281	293	287
	40	22	622	6	13.5	541	262	394	328					52	41	1016.67	580	15.48	970	254	314	284
	41	22	622	91	13.3	552	266	383	324.5					53	41	1016.67	530	26.41	980	664	1032	848
	42	22	622	16	12.9	568	312	342	327					54	41	1016.67	600	24.9	1250	491	824	657.5
	43	22	622	93	7.7	464	219	330	274.5					55	41	1016.67	520	22.35	1140	472	636	554
	44	22	622	97	10.4	476	262	426	344					56	41	1016.67	530	21.57	1020	495	493	494
	45	22	622	104	13	498	287	441	364					57	41	1016.67	550	28.82	1260	500	504	502
	46	22	622	99	11.3	469	247	360	303.5					58	41	1016.67	420	27.26	1190	554	762	658
	47	22	622	15	10.5	521	289	314	301.5					59	41	1016.67	410	22.43	1020	585	572	578.5
	48	22	622	99	10.7	511	243	335	289					60	41	1016.67	400	15.93	850	369	302	335.5
	Average value	22	622	71.6521	11.6385	509.312	266.875	380.583	323.729					61	41	1016.67	510	16.58	1050	475	392	433.5
														Average value	41	1016.67	621.541	17.1113	1085.74	352.262	381.066	366.664
																						373.961
Sample plot	Number	age(a)	Stand density(tree*hm-2)	Branch height (cm)	DBH(cm)	Tree height(cm)	Crown width north-south(cm)	Eastern and Western Crown(cm)	Average crown width(cm)				Sample plot	Number	age(a)	Stand density(tree*hm-2)	Branch height (cm)	DBH(cm)	Tree height(cm)	Crown width north-south(cm)	Eastern and Western Crown(cm)	Average crown width(cm)
HMS③	1	22	608.667	91	13.1	650	268	366	317				MS MD ①	1	41	688	610	23.12	1280	439	493	466
	2	22	608.667	69	14.2	672	252	443	347.5					2	41	688	620	21.05	1270	433	427	430
	3	22	608.667	68	12.3	644	231	413	322					3	41	688	610	29.44	1210	636	507	571.5
	4	22	608.667	111	9.6	589	244	382	313					4	41	688	580	24.4	1170	492	573	532.5
	5	22	608.667	35	15.1	640	298	410	354					5	41	688	600	20.86	1200	524	452	488
	6	22	608.667	109	14.3	623	267	408	337.5					6	41	688	530	20.18	1180	530	545	537.5
	7	22	608.667	85	13.5	621	270	394	332					7	41	688	650	21.93	1080	294	610	452
	8	22	608.667	121	13.8	612	243	510	376.5					8	41	688	700	22.35	1280	431	575	503
	9	22	608.667	98	16.3	601	397	602	499.5					9	41	688	700	21.18	1300	424	471	447.5
	10	22	608.667	72	9.4	553	269	478	373.5					10	41	688	840	24.74	1320	602	531	566.5
	11	22	608.667	69	12.5	598	342	515	428.5					11	41	688	780	24.4	1380	515	606	560.5
	12	22	608.667	56	11	551	368	334	351					12	41	688	820	19.17	1250	291	449	370
	13	22	608.667	93	12.7	638	293	350	321.5					13	41	688	780	16.41	1180	397	449	423
	14	22	608.667	44	14.4	610	324	474	399					14	41	688	900	15.28	1170	314	332	323
	15	22	608.667	106	14.7	645	432	566	499					15	41	688	720	25.9	1310	413	645	529
	16	22	608.667	121	11	652	193	420	306.5					16	41	688	680	23.07	1200	537	426	481.5
	17	22	608.667	115	13.8	631	283	528	405.5					17	41	688	800	22.59	1280	466	479	472.5
	18	22	608.667	91	13.6	565	241	372	306.5					18	41	688	710	23.36	1310	483	447	465
	19	22	608.667	71	11.6	689	281	423	352					19	41	688	860	22.73	1160	412	404	408
	20	22	608.667	55	10.7	581	267	285	276					20	41	688	580	19.48	1280	409	415	412
	21	22	608.667	81	8	452	212	315	263.5					21	41	688	680	21.02	1230	349	332	340.5
	22	22	608.667	105	10.9	518	475	364	419.5					22	41	688	830	14.86	1210	256	315	285.5
	23	22	608.667	88	15.2	692	283	430	356.5					23	41	688	910	21.55	1270	388	484	436
	24	22	608.667	76	9.5	518	234	395	314.5					24	41	688	850	26.21	1220	447	523	485
	25	22	608.667	85	11.3	582	289	383	336					25	41	688	840	13.1	1230	239	235	237
	26	22	608.667	84	13.8	644	376	424	400					26	41	688	940	30.5	1410	439	694	566.5
	27	22	608.667	72	13.1	650	282	435	358.5					27	41	688	880	20.77	1370	340	452	396
	28	22	608.667	92	10.9	551	278	477	377.5					28	41	688	980	19.47	1420	325	336	330.5
	29	22	608.667	73	12.3	569	318	364	341					29	41	688	760	23.51	1360	457	441	449
	30	22	608.667	59	13	670	405	524	464.5					30	41	688	650	16.42	1120	269	251	260
	31	22	608.667	83	9.2	441	368	336	352					31	41	688	800	21.3	1270	482	410	446
	32	22	608.667	102	12.6	566	317	428	372.5					32	41	688	740	25.28	1200	452	403	427.5
	33	22	608.667	98	12.8	570	314	397	355.5					33	41	688	850	22.48	1120	439	422	430.5
	34	22	608.667	92	12.8	548	235	403	319					34	41	688	800	20.78	1220	334	375	354.5
	35	22	608.667	72	12.3	575	274	396	335					35	41	688	880	18.48	1210	312	461	386.5
	36	22	608.667	85	12.3	610	268	435	351.5					36	41	688	840	14.4	1280	384	213	298.5
	37	22	608.667	117	15.2	643	421	486	453.5					37	41	688	860	25.28	1320	423	346	384.5
	38	22	608.667	99	14.4	647	289	482	385.5					38	41	688	830	18.58	1270	385	397	391
	39	22	608.667	83	11.9	651	297	367	332					39	41	688	790	20.95	1160	459	407	433
	40	22	608.667	82	11.5	573	251	423	337					40	41	688	590	24.57	1140	496	423	459.5
	41	22	608.667	74	12.1	556	278	418	348					41	41	688	740	16.8	1150	382	273	327.5
	42	22	608.667	89	15.3	555	272	336	304					42	41	688	930	24.68	1330	493	390	441.5
	Average value	22	608.667	85.0238	12.5714	598.714	297.595	421.214	359.405					43	41	688	860	24.36	1350	579	431	505
														44	41	688	820	26.35	1310	513	635	574
														45	41	688	830	20.54	1280	432	493	462.5
														46	41	688	720	19.82	1170	472	409	440.5
Sample plot	Number	age(a)	Stand density(tree*hm-2)	Branch height (cm)	DBH(cm)	Tree height(cm)	Crown width north-south(cm)	Eastern and Western Crown(cm)	Average crown width(cm)					47	41	688	710	21.06	1230	413	491	452
NMS MD①	1	33	816.667	463	24.28	1094	562	648	605					48	41	688	910	21.18	1420	325	478	401.5
	2	33	816.667	610	14.7	800	301	288	294.5					49	41	688	880	19.07	1220	315	306	310.5
	3	33	816.667	580	18.2	860	329	382	355.5					50	41	688	760	20.78	1210	473	442	457.5
	4	33	816.667	370	22.9	1035	573	423	498					51	41	688	850	25.4	1430	603	537	570
	5	33	816.667	360	19.48	970	490	483	486.5					52	41	688	620	25.27	1320	529	511	520
	6	33	816.667	310	23.8	960	496	359	427.5					53	41	688	650	18.75	1080	398	509	453.5
	7	33	816.667	250	21.7	870	484	455	469.5					54	41	688	590	23.86	1220	603	571	587
	8	33	816.667	300	14.8	830	373	289	331					Average value	41	688	763.704	21.6494	1251.11	430.5	448.741	439.62
	9	33	816.667	340	19.1	740	417	428	422.5
	10	33	816.667	560	12.35	950	375	296	335.5
	11	33	816.667	500	16.5	1020	311	255	283				Sample plot	Number	age(a)	Stand density(tree*hm-2)	Branch height (cm)	DBH(cm)	Tree height(cm)	Crown width north-south(cm)	Eastern and Western Crown(cm)	Average crown width(cm)
	12	33	816.667	510	21.2	970	253	297	275				MS MD ②	1	41	648	700	24.64	1410	503	479	491
	13	33	816.667	740	16.15	960	247	234	240.5					2	41	648	65	18.68	880	320	524	422
	14	33	816.667	770	11	950	128	161	144.5					3	41	648	710	18.2	1210	422	351	386.5
	15	33	816.667	520	11.77	1010	297	154	225.5					4	41	648	680	20.95	1150	398	382	390
	16	33	816.667	660	13.9	960	301	355	328					5	41	648	660	19.98	1200	482	433	457.5
	17	33	816.667	530	16.02	960	372	428	400					6	41	648	910	21.77	1420	431	437	434
	18	33	816.667	470	16.8	810	337	411	374					7	41	648	640	18.08	1190	383	532	457.5
	19	33	816.667	720	15.8	1060	416	266	341					8	41	648	940	18.7	1310	378	319	348.5
	20	33	816.667	760	15.9	970	281	158	219.5					9	41	648	830	17.42	1340	420	401	410.5
	21	33	816.667	660	13.38	910	231	202	216.5					10	41	648	850	19.5	1370	540	382	461
	22	33	816.667	630	14.69	950	393	276	334.5					11	41	648	830	14.3	1160	279	305	292
	23	33	816.667	620	13.5	910	305	165	235					12	41	648	640	20.12	1320	609	593	601
	24	33	816.667	650	16.47	960	388	304	346					13	41	648	780	26.22	1360	578	565	571.5
	25	33	816.667	560	14.35	870	401	329	365					14	41	648	820	22.35	1350	471	423	447
	26	33	816.667	450	17.1	910	326	205	265.5					15	41	648	750	17.77	1260	412	403	407.5
	27	33	816.667	500	13.65	970	295	364	329.5					16	41	648	650	25.68	1320	504	595	549.5
	28	33	816.667	570	13.43	920	300	236	268					17	41	648	580	18.87	1150	452	465	458.5
	29	33	816.667	570	27.7	950	552	374	463					18	41	648	630	18.9	1410	415	503	459
	30	33	816.667	360	18.15	910	493	363	428					19	41	648	810	16.78	1340	421	383	402
	31	33	816.667	660	16.3	920	386	423	404.5					20	41	648	730	23.62	1440	495	507	501
	32	33	816.667	460	26.8	870	442	481	461.5					21	41	648	800	17.92	1270	334	340	337
	33	33	816.667	580	17.6	1160	435	237	336					22	41	648	640	19.45	1310	452	410	431
	34	33	816.667	500	21.76	1080	435	391	413					23	41	648	650	20.65	1300	466	512	489
	35	33	816.667	560	14.5	1060	371	209	290					24	41	648	580	21	1320	391	429	410
	36	33	816.667	460	17.9	950	381	319	350					25	41	648	600	21.52	1380	422	454	438
	37	33	816.667	510	18.9	1160	445	348	396.5					26	41	648	640	22.58	1320	576	502	539
	38	33	816.667	410	18.12	1070	418	443	430.5					27	41	648	610	17	1240	524	439	481.5
	39	33	816.667	610	14	1060	344	256	300					28	41	648	750	15.68	1210	303	465	384
	40	33	816.667	710	14.2	1010	309	221	265					29	41	648	760	19.9	1280	357	277	317
	41	33	816.667	760	18.7	1100	526	247	386.5					30	41	648	620	17.52	1080	395	351	373
	42	33	816.667	500	19.08	960	388	379	383.5					31	41	648	780	19.67	1130	402	395	398.5
	43	33	816.667	560	13.86	1160	298	225	261.5					32	41	648	830	20.29	1280	494	435	464.5
	44	33	816.667	740	15.1	1010	328	290	309					33	41	648	630	22.28	1420	544	461	502.5
	45	33	816.667	410	20.62	880	404	329	366.5					34	41	648	650	19.95	1140	366	398	382
	46	33	816.667	390	18.9	950	331	364	347.5					35	41	648	780	19.37	1230	416	337	376.5
	47	33	816.667	560	19.13	860	280	437	358.5					36	41	648	540	16.62	980	373	365	369
	48	33	816.667	370	17.8	910	398	377	387.5					37	41	648	650	18.63	1040	399	394	396.5
	49	33	816.667	640	16.3	810	447	315	381					38	41	648	840	18.9	1320	402	325	363.5
	Average value	33	816.667	536.388	17.3131	959.571	375.367	324.061	349.714					39	41	648	430	17.2	950	319	382	350.5
														40	41	648	410	21.56	1130	520	503	511.5
														41	41	648	420	25.94	1150	516	492	504
														42	41	648	680	18.38	1050	405	335	370
Sample plot	Number	age(a)	Stand density(tree*hm-2)	Branch height (cm)	DBH(cm)	Tree height(cm)	Crown width north-south(cm)	Eastern and Western Crown(cm)	Average crown width(cm)					43	41	648	630	24.18	1230	522	412	467
NMS MD ②	1	33	783.333	350	16.2	962	394	375	384.5					44	41	648	780	14.65	1120	291	386	338.5
	2	33	783.333	440	13	760	268	296	282					45	41	648	700	14	1020	315	325	320
	3	33	783.333	520	14.6	998	269	287	278					46	41	648	700	18.9	1200	383	422	402.5
	4	33	783.333	540	16.21	960	482	486	484					47	41	648	610	19.5	1140	282	310	296
	5	33	783.333	360	19	670	378	535	456.5					48	41	648	580	16.95	1110	304	402	353
	6	33	783.333	370	18.21	940	430	289	359.5					49	41	648	450	20.9	1160	345	384	364.5
	7	33	783.333	340	19.19	960	404	379	391.5					Average value	41	648	672.347	19.6657	1226.53	423.082	420.898	421.99
	8	33	783.333	390	12.8	670	357	234	295.5
	9	33	783.333	420	21.3	1050	614	472	543
	10	33	783.333	320	23.1	970	455	539	497				Sample plot	Number	age(a)	Stand density(tree*hm-2)	Branch height (cm)	DBH(cm)	Tree height(cm)	Crown width north-south(cm)	Eastern and Western Crown(cm)	Average crown width(cm)
	11	33	783.333	520	19.6	860	327	392	359.5				MS MD ③	1	41	633	850	18.08	1100	2560	342	1451
	12	33	783.333	500	18.7	870	386	459	422.5					2	41	633	700	21.27	1030	443	512	477.5
	13	33	783.333	460	18.65	990	466	457	461.5					3	41	633	720	17.45	1180	293	315	304
	14	33	783.333	550	19.65	1060	266	247	256.5					4	41	633	650	17.78	1040	389	467	428
	15	33	783.333	560	16.2	930	254	239	246.5					5	41	633	510	23.78	1100	551	585	568
	16	33	783.333	540	15.7	960	334	422	378					6	41	633	650	18.54	1130	324	470	397
	17	33	783.333	320	17.2	920	380	254	317					7	41	633	730	16.32	1080	324	352	338
	18	33	783.333	560	13.5	900	337	196	266.5					8	41	633	730	16.15	1070	341	279	310
	19	33	783.333	610	15.2	940	274	302	288					9	41	633	630	18.57	1110	381	407	394
	20	33	783.333	610	13.6	910	356	303	329.5					10	41	633	480	17.63	1010	374	489	431.5
	21	33	783.333	370	24.6	840	615	787	701					11	41	633	640	19.61	1120	538	505	521.5
	22	33	783.333	560	16.4	970	497	285	391					12	41	633	620	19.37	1110	441	480	460.5
	23	33	783.333	600	21.45	1060	391	107	249					13	41	633	440	15.15	910	363	408	385.5
	24	33	783.333	690	23.3	1080	492	364	428					14	41	633	670	13.58	1010	415	330	372.5
	25	33	783.333	660	16.6	1010	397	327	362					15	41	633	630	23.15	1170	521	543	532
	26	33	783.333	590	18.1	1010	426	308	367					16	41	633	380	13.42	1100	574	484	529
	27	33	783.333	720	18.9	1040	423	374	398.5					17	41	633	650	21.52	1220	625	589	607
	28	33	783.333	720	17.5	1020	365	223	294					18	41	633	760	15.3	1170	331	384	357.5
	29	33	783.333	330	22.7	1100	396	307	351.5					19	41	633	580	20.28	1140	530	495	512.5
	30	33	783.333	700	17	1030	380	300	340					20	41	633	780	22.68	1210	540	430	485
	31	33	783.333	420	21.2	1110	469	356	412.5					21	41	633	470	26.88	1250	674	589	631.5
	32	33	783.333	600	15.1	910	420	317	368.5					22	41	633	600	18.15	980	506	463	484.5
	33	33	783.333	610	18.22	1010	339	349	344					23	41	633	680	15.6	940	285	404	344.5
	34	33	783.333	760	14.5	960	197	289	243					24	41	633	580	22.02	1220	461	437	449
	35	33	783.333	500	11.6	910	280	256	268					25	41	633	590	19.92	1160	421	425	423
	36	33	783.333	400	17.05	950	386	345	365.5					26	41	633	610	21.08	1120	553	435	494
	37	33	783.333	320	23	1000	595	490	542.5					27	41	633	440	23.14	1110	589	674	631.5
	38	33	783.333	420	23.95	1010	542	462	502					28	41	633	620	25.95	1150	613	674	643.5
	39	33	783.333	510	18.8	840	453	312	382.5					29	41	633	590	22.51	1130	465	528	496.5
	40	33	783.333	560	17	900	445	385	415					30	41	633	700	21.67	1210	505	453	479
	41	33	783.333	410	13.1	860	278	204	241					31	41	633	510	20.17	1120	553	544	548.5
	42	33	783.333	560	13.3	800	357	223	290					32	41	633	450	22.87	1110	611	406	508.5
	43	33	783.333	610	14.2	1050	295	218	256.5					33	41	633	540	19.98	1090	366	421	393.5
	44	33	783.333	540	18.2	1070	478	298	388					34	41	633	540	25.12	1280	532	690	611
	45	33	783.333	640	20.2	1060	465	410	437.5					35	41	633	570	27.68	1260	661	572	616.5
	46	33	783.333	560	26.6	1020	613	595	604					36	41	633	430	19.58	950	441	331	386
	47	33	783.333	600	22.2	1040	530	463	496.5					37	41	633	580	24.25	1220	592	516	554
	平均	33	783.333	515.745	18.0081	956.17	403.298	351.426	377.362					38	41	633	510	21.97	1100	613	557	585
														39	41	633	640	22.12	1130	560	463	511.5
														40	41	633	470	25.05	1180	562	492	527
														41	41	633	650	23.17	1280	546	541	543.5
Sample plot	Number	age(a)	Stand density(tree*hm-2)	Branch height (cm)	DBH(cm)	Tree height(cm)	Crown width north-south(cm)	Eastern and Western Crown(cm)	Average crown width(cm)					42	41	633	570	23.93	1170	604	625	614.5
NMS MD ③	1	33	716.667	430	17.45	820	424	351	387.5					Average value	41	633	598.571	20.5343	1123.1	537.405	478.714	508.06
	2	33	716.667	470	14.08	890	298	258	278													453.548
	3	33	716.667	440	24.3	970	596	531	563.5
	4	33	716.667	420	17.1	890	251	195	223
	5	33	716.667	450	17.6	900	415	239	327				Sample plot	Number	age(a)	Stand density(tree*hm-2)	Branch height (cm)	DBH(cm)	Tree height(cm)	Crown width north-south(cm)	Eastern and Western Crown(cm)	Average crown width(cm)
	6	33	716.667	490	18.2	900	332	228	280				MS LD ①	1	41	341	380	24.2	1060	559	622	590.5
	7	33	716.667	560	17.4	960	395	284	339.5					2	41	341	360	29.45	900	552	534	543
	8	33	716.667	590	20.6	1020	450	562	506					3	41	341	460	29.72	1260	685	710	697.5
	9	33	716.667	560	15.4	750	285	206	245.5					4	41	341	420	23.73	1070	663	639	651
	10	33	716.667	590	15.8	980	395	331	363					5	41	341	340	24.92	1280	656	554	605
	11	33	716.667	480	15.6	810	396	453	424.5					6	41	341	440	20.57	1100	659	594	626.5
	12	33	716.667	480	12.6	940	386	285	335.5					7	41	341	500	25.1	1120	619	598	608.5
	13	33	716.667	560	12.4	920	313	209	261					8	41	341	460	29.2	1040	847	703	775
	14	33	716.667	450	16.4	890	308	293	300.5					9	41	341	400	27.8	1090	714	782	748
	15	33	716.667	450	15.4	950	304	327	315.5					10	41	341	490	25.88	990	698	595	646.5
	16	33	716.667	460	21.7	960	492	304	398					11	41	341	460	22.18	1090	576	618	597
	17	33	716.667	520	12.2	810	265	217	241					12	41	341	460	28.28	1210	602	722	662
	18	33	716.667	400	13.7	920	342	256	299					13	41	341	450	23.3	1150	615	543	579
	19	33	716.667	410	18	900	421	365	393					14	41	341	300	19.3	960	539	441	490
	20	33	716.667	470	16.1	760	413	342	377.5					15	41	341	300	24.52	1030	566	555	560.5
	21	33	716.667	410	23.7	990	506	583	544.5					Average value	41	341	414.667	25.21	1090	636.667	614	625.333
	22	33	716.667	480	18	910	583	354	468.5
	23	33	716.667	460	22.3	950	573	247	410
	24	33	716.667	590	14.1	970	246	234	240				样地	Number	age(a)	Stand density(tree*hm-2)	枝下高cm	胸径cm	树高cm	冠幅南北cm	冠幅东西cm	平均冠幅cm
	25	33	716.667	490	23.1	1040	456	432	444				MS LD ②	1	41	311	330	26.5	1160	750	746	748
	26	33	716.667	450	19.3	960	422	484	453					2	41	311	350	31.95	920	875	880	877.5
	27	33	716.667	380	15.3	830	418	252	335					3	41	311	320	27.9	1200	792	695	743.5
	28	33	716.667	360	17	820	396	245	320.5					4	41	311	200	25.24	940	603	497	550
	29	33	716.667	360	12.1	710	306	316	311					5	41	311	340	24.44	1210	615	627	621
	30	33	716.667	420	25.3	960	487	633	560					6	41	311	340	24.35	980	813	774	793.5
	31	33	716.667	430	16.5	890	418	375	396.5					7	41	311	320	25.4	1110	578	545	561.5
	32	33	716.667	400	11.5	700	223	252	237.5					8	41	311	370	25.78	910	612	575	593.5
	33	33	716.667	430	15.3	830	372	293	332.5					9	41	311	460	22.76	1060	553	550	551.5
	34	33	716.667	430	18.4	900	516	417	466.5					10	41	311	480	26.65	920	615	660	637.5
	35	33	716.667	510	18.3	970	405	296	350.5					11	41	311	450	25.58	1050	730	646	688
	36	33	716.667	450	18.1	810	482	379	430.5					12	41	311	440	23.83	950	681	701	691
	37	33	716.667	440	14.4	830	423	326	374.5					Average value	41	311	366.667	25.865	1034.17	684.75	658	671.375
	38	33	716.667	360	19.9	980	399	407	403
	39	33	716.667	500	15	850	321	300	310.5
	40	33	716.667	440	13.35	890	265	245	255				Sample plot	Number	age(a)	Stand density(tree*hm-2)	Branch height (cm)	DBH(cm)	Tree height(cm)	Crown width north-south(cm)	Eastern and Western Crown(cm)	Average crown width(cm)
	41	33	716.667	470	20.4	1000	489	356	422.5				MS LD ③	1	41	318	360	22.7	1040	554	550	552
	42	33	716.667	390	15.5	850	334	213	273.5					2	41	318	480	22.12	1020	631	664	647.5
	43	33	716.667	380	21.3	1070	513	339	426					3	41	318	510	13.33	960	812	802	807
	Average value	33	716.667	458.372	17.2135	898.837	396.14	330.558	363.349					4	41	318	420	23.42	1150	574	637	605.5
									363.285					5	41	318	410	16.64	960	435	489	462
														6	41	318	390	27.6	950	694	595	644.5
														7	41	318	340	25.48	1120	665	678	671.5
Sample plot	Number	age(a)	Stand density(tree*hm-2)	Branch height (cm)	DBH(cm)	Tree height(cm)	Crown width north-south(cm)	Eastern and Western Crown(cm)	Average crown width(cm)					8	41	318	350	24.16	920	689	695	692
NMS LD①	1	33	550	380	19.85	870	481	378	429.5					9	41	318	520	33.47	1110	831	740	785.5
	2	33	550	260	16.68	760	386	431	408.5					10	41	318	300	23.3	910	663	531	597
	3	33	550	420	19.83	780	432	476	454					11	41	318	380	27.18	1160	831	850	840.5
	4	33	550	370	15.1	750	297	478	387.5					12	41	318	340	27.05	1140	724	687	705.5
	5	33	550	360	22.73	880	566	637	601.5					13	41	318	410	30.88	1210	823	863	843
	6	33	550	380	13.6	750	347	311	329					Average value	41	318	400.769	24.41	1050	686.615	675.462	681.038
	7	33	550	250	19.5	780	586	546	566
	8	33	550	230	19.9	910	592	388	490
	9	33	550	410	17.6	810	384	549	466.5
	10	33	550	240	18.7	880	433	556	494.5				Sample plot	Number	age(a)	Stand density(tree*hm-2)	Branch height (cm)	DBH(cm)	Tree height(cm)	Crown width north-south(cm)	Eastern and Western Crown(cm)	Average crown width(cm)
	11	33	550	420	18.5	800	433	461	447				OMS ①	1	61	266.667	590	32.32	1140	583	607	595
	12	33	550	390	23.05	910	409	453	431					2	61	266.667	600	46.89	1360	662	763	712.5
	13	33	550	380	19.25	780	395	423	409					3	61	266.667	400	27.76	1190	627	526	576.5
	14	33	550	260	17.95	810	592	487	539.5					4	61	266.667	620	22.17	1220	344	393	368.5
	15	33	550	240	15.05	690	366	467	416.5					5	61	266.667	520	40.47	1500	535	647	591
	16	33	550	320	21.5	880	632	536	584					6	61	266.667	540	26.48	1230	526	513	519.5
	17	33	550	250	19.4	630	445	413	429					7	61	266.667	610	27.68	1290	449	576	512.5
	18	33	550	310	15.4	820	355	352	353.5					8	61	266.667	790	20.87	1320	398	342	370
	19	33	550	250	19.85	780	437	514	475.5					9	61	266.667	800	15.98	1190	402	311	356.5
	20	33	550	270	16.1	710	451	423	437					10	61	266.667	820	20.75	1310	273	295	284
	21	33	550	240	25.7	850	621	500	560.5					11	61	266.667	740	20.36	1430	286	357	321.5
	22	33	550	240	23.05	890	472	489	480.5					12	61	266.667	780	18.32	1190	382	423	402.5
	23	33	550	240	27.2	790	564	582	573					13	61	266.667	850	24.76	1440	442	417	429.5
	24	33	550	210	21.6	820	482	499	490.5					14	61	266.667	860	17.28	1210	233	327	280
	25	33	550	410	17.4	780	465	391	428					15	61	266.667	710	22.68	1320	335	433	384
	26	33	550	310	20.4	830	483	507	495					16	61	266.667	830	21.95	1460	376	382	379
	27	33	550	290	19.85	720	543	504	523.5					17	61	266.667	860	18.18	1370	327	333	330
	28	33	550	330	13.9	720	276	293	284.5					18	61	266.667	760	20	1420	267	393	330
	29	33	550	240	13.5	680	432	361	396.5					19	61	266.667	690	22.68	1420	468	457	462.5
	30	33	550	260	24	880	493	539	516					20	61	266.667	650	24.63	1260	408	412	410
	31	33	550	520	13.3	780	382	317	349.5					21	61	266.667	810	21.43	1310	472	356	414
	32	33	550	400	15.6	770	503	312	407.5					22	61	266.667	680	23.09	1510	313	465	389
	33	33	550	270	28.75	910	662	693	677.5					23	61	266.667	820	22.68	1370	503	496	499.5
	Average value	33	550	313.636	19.2058	800	466.576	462.606	464.591					24	61	266.667	660	28.55	1460	478	752	615
														Average value	61	266.667	707.917	24.4983	1330	420.375	457.333	438.854
Sample plot	Number	age(a)	Stand density(tree*hm-2)	Branch height (cm)	DBH(cm)	Tree height(cm)	Crown width north-south(cm)	Eastern and Western Crown(cm)	Average crown width(cm)				Sample plot	Number	age(a)	Stand density(tree*hm-2)	Branch height (cm)	DBH(cm)	Tree height(cm)	Crown width north-south(cm)	Eastern and Western Crown(cm)	Average crown width(cm)
NMS LD②	1	33	516.667	360	18.23	830	512	273	392.5				OMS ②	1	61	233.333	720	41.05	1400	906	633	769.5
	2	33	516.667	330	15.95	830	437	307	372					2	61	233.333	620	42.63	1460	924	817	870.5
	3	33	516.667	350	13.8	670	373	451	412					3	61	233.333	620	26.88	1310	643	371	507
	4	33	516.667	320	16.2	760	389	419	404					4	61	233.333	560	36.95	1280	791	633	712
	5	33	516.667	370	16.3	740	422	439	430.5					5	61	233.333	630	30.78	1300	683	612	647.5
	6	33	516.667	390	21.8	830	422	496	459					6	61	233.333	610	27.88	1030	530	482	506
	7	33	516.667	240	17.4	730	383	284	333.5					7	61	233.333	660	40.32	1610	841	685	763
	8	33	516.667	410	14.1	780	356	303	329.5					8	61	233.333	560	30.18	1270	678	562	620
	9	33	516.667	310	19.7	690	572	381	476.5					9	61	233.333	820	24.72	1330	457	384	420.5
	10	33	516.667	420	10.1	630	210	193	201.5					10	61	233.333	600	29.09	1210	648	743	695.5
	11	33	516.667	250	20.6	730	463	527	495					11	61	233.333	640	29.15	1500	558	567	562.5
	12	33	516.667	400	14.5	650	398	399	398.5					12	61	233.333	790	25.96	1420	456	367	411.5
	13	33	516.667	330	15.3	820	452	322	387					13	61	233.333	830	18.2	1340	275	264	269.5
	14	33	516.667	410	18.1	820	452	369	410.5					14	61	233.333	640	26.19	1410	420	293	356.5
	15	33	516.667	390	18.1	810	445	323	384					Average value	61	233.333	664.286	30.7129	1347.86	629.286	529.5	579.393
	16	33	516.667	370	17.3	790	559	449	504
	17	33	516.667	360	12.75	720	337	529	433
	18	33	516.667	280	15.2	800	356	323	339.5				Sample plot	Number	age(a)	Stand density(tree*hm-2)	Branch height (cm)	DBH(cm)	Tree height(cm)	Crown width north-south(cm)	Eastern and Western Crown(cm)	Average crown width(cm)
	19	33	516.667	430	19.15	800	487	486	486.5				OMS③	1	61	233.333	810	37.28	1400	851	782	816.5
	20	33	516.667	430	12.75	640	342	273	307.5					2	61	233.333	530	24.76	1370	648	633	640.5
	21	33	516.667	410	20	820	429	382	405.5					3	61	233.333	560	29.83	1150	713	606	659.5
	22	33	516.667	430	15.7	700	482	396	439					4	61	233.333	500	25.3	1200	589	445	517
	23	33	516.667	360	16.5	790	443	337	390					5	61	233.333	590	34.67	1190	736	526	631
	24	33	516.667	280	18.7	780	540	481	510.5					6	61	233.333	660	30.38	1040	683	642	662.5
	25	33	516.667	340	19.9	780	367	340	353.5					7	61	233.333	620	33.69	1370	585	546	565.5
	26	33	516.667	350	15.5	680	415	362	388.5					8	61	233.333	750	36.95	1360	529	573	551
	27	33	516.667	270	18.3	790	447	395	421					9	61	233.333	560	31.45	1210	507	592	549.5
	28	33	516.667	340	22.95	810	513	541	527					10	61	233.333	740	21.2	1330	417	394	405.5
	29	33	516.667	270	18	740	436	439	437.5					11	61	233.333	800	33.04	1460	746	645	695.5
	30	33	516.667	380	20.7	820	398	415	406.5					12	61	233.333	520	31.76	930	619	523	571
	31	33	516.667	380	15	810	363	359	361					13	61	233.333	580	22.47	1070	631	629	630
	32	33	516.667	450	18.95	900	515	349	432					14	61	233.333	700	36.7	1260	635	819	727
	33	33	516.667	480	19.25	920	519	372	445.5					Average value	61	233.333	637.143	30.6771	1238.57	634.929	596.786	615.857
	34	33	516.667	510	16.8	930	346	356	351
	35	33	516.667	440	16.3	760	399	363	381
	36	33	516.667	310	14.25	910	485	303	394
	37	33	516.667	400	24.3	920	517	442	479.5
	38	33	516.667	240	13.75	750	356	299	327.5
	39	33	516.667	350	19.8	830	573	396	484.5
	40	33	516.667	310	19.25	830	429	384	406.5
	41	33	516.667	410	16.4	820	407	391	399
	Average value	33	516.667	362.439	17.2593	784.39	432.829	381.659	407.244
Sample plot	Number	age(a)	Stand density(tree*hm-2)	Branch height (cm)	DBH(cm)	Tree height(cm)	Crown width north-south(cm)	Eastern and Western Crown(cm)	Average crown width(cm)
NMS LD ③	1	33	450	320	18.9	890	522	492	507
	2	33	450	400	22.03	900	489	503	496
	3	33	450	200	15.09	680	476	363	419.5
	4	33	450	200	16.58	560	413	532	472.5
	5	33	450	380	20.9	890	437	492	464.5
	6	33	450	240	23.43	780	563	567	565
	7	33	450	450	14.06	720	402	257	329.5
	8	33	450	430	22.02	820	543	493	518
	9	33	450	280	22.1	800	552	496	524
	10	33	450	450	21.74	790	574	467	520.5
	11	33	450	360	22.57	910	574	415	494.5
	12	33	450	240	19.95	710	619	548	583.5
	13	33	450	240	17.25	680	609	356	482.5
	14	33	450	530	17.65	760	428	301	364.5
	15	33	450	270	19.65	910	457	672	564.5
	16	33	450	280	18.1	810	407	382	394.5
	17	33	450	270	22.7	800	489	676	582.5
	18	33	450	310	15.2	870	425	429	427
	19	33	450	270	13.7	800	445	356	400.5
	20	33	450	300	20.25	840	536	617	576.5
	21	33	450	340	16.7	850	365	369	367
	22	33	450	300	11.5	610	342	263	302.5
	23	33	450	230	17.45	840	372	277	324.5
	24	33	450	310	17.15	760	385	372	378.5
	25	33	450	240	14.3	680	397	336	366.5
	26	33	450	280	19.4	710	478	596	537
	27	33	450	300	17.45	800	403	388	395.5
	Average value	33	450	311.852	18.4378	784.074	470.444	445	457.722
									439.582
Sample plot	Number	age(a)	Stand density(tree*hm-2)	Branch height (cm)	DBH(cm)	Tree height(cm)	Crown width north-south(cm)	Eastern and Western Crown(cm)	Average crown width(cm)
NMS HD①	1	33	1216.67	360	13.2	630	313	290	301.5
	2	33	1216.67	230	13.5	660	314	218	266
	3	33	1216.67	202	14.1	530	419	316	367.5
	4	33	1216.67	260	23.4	910	524	361	442.5
	5	33	1216.67	210	13.28	870	491	188	339.5
	6	33	1216.67	340	11.8	710	314	202	258
	7	33	1216.67	280	19.37	820	452	461	456.5
	8	33	1216.67	430	9.8	640	232	132	182
	9	33	1216.67	410	13.39	890	308	169	238.5
	10	33	1216.67	480	18	780	344	281	312.5
	11	33	1216.67	510	17.62	920	284	234	259
	12	33	1216.67	330	21.87	960	466	484	475
	13	33	1216.67	220	18.68	780	355	396	375.5
	14	33	1216.67	230	16.1	770	409	244	326.5
	15	33	1216.67	240	12.28	540	249	301	275
	16	33	1216.67	470	13.75	800	271	339	305
	17	33	1216.67	520	13.16	930	259	228	243.5
	18	33	1216.67	510	9.5	690	184	171	177.5
	19	33	1216.67	610	15.6	970	288	324	306
	20	33	1216.67	350	12.06	710	338	205	271.5
	21	33	1216.67	440	17.6	820	366	334	350
	22	33	1216.67	510	10.8	690	259	161	210
	23	33	1216.67	350	21.32	890	473	442	457.5
	24	33	1216.67	360	18.58	980	426	403	414.5
	25	33	1216.67	370	17.06	780	361	356	358.5
	26	33	1216.67	320	15.69	810	422	404	413
	27	33	1216.67	440	14.47	910	328	244	286
	28	33	1216.67	350	15.96	800	341	285	313
	29	33	1216.67	420	16.22	880	344	352	348
	30	33	1216.67	410	16.55	910	299	231	265
	31	33	1216.67	280	11.9	610	334	237	285.5
	32	33	1216.67	440	15.31	780	443	422	432.5
	33	33	1216.67	610	17.06	880	378	273	325.5
	34	33	1216.67	590	13.09	850	311	218	264.5
	35	33	1216.67	510	10.87	830	255	204	229.5
	36	33	1216.67	210	18.3	920	292	247	269.5
	37	33	1216.67	440	11.88	810	346	195	270.5
	38	33	1216.67	690	16.55	980	368	312	340
	39	33	1216.67	690	14.82	960	381	262	321.5
	40	33	1216.67	350	18.35	980	434	357	395.5
	41	33	1216.67	220	16.39	800	341	409	375
	42	33	1216.67	410	17.6	820	378	311	344.5
	43	33	1216.67	370	15.2	810	301	286	293.5
	44	33	1216.67	350	13.52	880	261	399	330
	45	33	1216.67	260	10.1	610	244	277	260.5
	46	33	1216.67	240	22.61	930	454	535	494.5
	47	33	1216.67	410	14.8	810	351	292	321.5
	48	33	1216.67	630	12.78	970	309	271	290
	49	33	1216.67	520	14	710	381	282	331.5
	50	33	1216.67	500	10.69	420	278	177	227.5
	51	33	1216.67	380	12.48	770	435	314	374.5
	52	33	1216.67	380	14.05	870	308	359	333.5
	53	33	1216.67	190	14.3	810	410	344	377
	54	33	1216.67	390	21.1	960	411	300	355.5
	55	33	1216.67	360	16.88	890	366	309	337.5
	56	33	1216.67	350	17	890	411	356	383.5
	57	33	1216.67	240	13.7	680	399	391	395
	58	33	1216.67	400	19.12	780	422	418	420
	59	33	1216.67	410	15.56	890	362	277	319.5
	60	33	1216.67	610	10.4	830	269	162	215.5
	61	33	1216.67	670	12.5	830	198	204	201
	62	33	1216.67	370	17.88	780	371	341	356
	63	33	1216.67	230	26.31	940	817	642	729.5
	64	33	1216.67	390	17.78	770	482	472	477
	65	33	1216.67	340	20.1	920	424	574	499
	66	33	1216.67	360	12.6	580	191	223	207
	67	33	1216.67	370	21.19	980	534	415	474.5
	68	33	1216.67	370	22.83	920	436	471	453.5
	69	33	1216.67	530	9.87	770	244	201	222.5
	70	33	1216.67	520	12.18	850	244	228	236
	71	33	1216.67	480	16.76	830	403	413	408
	72	33	1216.67	330	11.52	480	244	251	247.5
	73	33	1216.67	560	14.1	930	314	269	291.5
	74	33	1216.67	430	17.62	910	362	359	360.5
	75	33	1216.67	450	14.71	780	381	244	312.5
	76	33	1216.67	220	12.21	770	266	224	245
	Average value	33	1216.67	397.526	15.4642	812.5	354.961	308.987	331.974
Sample plot	Number	age(a)	Stand density(tree*hm-2)	Branch height (cm)	DBH(cm)	Tree height(cm)	Crown width north-south(cm)	Eastern and Western Crown(cm)	Average crown width(cm)
NMS HD②	1	33	1167.67	280	19.46	910	573	426	499.5
	2	33	1167.67	220	19.02	840	603	416	509.5
	3	33	1167.67	410	11.88	620	422	278	350
	4	33	1167.67	600	18.15	850	463	343	403
	5	33	1167.67	390	11.31	710	247	172	209.5
	6	33	1167.67	440	16.13	810	542	338	440
	7	33	1167.67	530	21.98	890	587	485	536
	8	33	1167.67	440	20.19	870	579	452	515.5
	9	33	1167.67	520	12.85	870	419	286	352.5
	10	33	1167.67	410	14.77	780	469	303	386
	11	33	1167.67	390	17.56	900	467	344	405.5
	12	33	1167.67	440	15.3	660	339	255	297
	13	33	1167.67	260	17.1	870	363	315	339
	14	33	1167.67	380	16.6	880	412	224	318
	15	33	1167.67	380	16.8	910	342	279	310.5
	16	33	1167.67	250	18.6	810	342	377	359.5
	17	33	1167.67	430	11.6	770	333	281	307
	18	33	1167.67	480	12.9	720	343	263	303
	19	33	1167.67	370	22.05	820	432	442	437
	20	33	1167.67	420	15.9	680	306	291	298.5
	21	33	1167.67	400	14.3	880	313	345	329
	22	33	1167.67	390	22.35	910	519	612	565.5
	23	33	1167.67	420	21.3	950	537	532	534.5
	24	33	1167.67	380	17.4	820	415	479	447
	25	33	1167.67	410	13.7	710	341	329	335
	26	33	1167.67	390	19.8	920	446	429	437.5
	27	33	1167.67	310	18.65	910	364	302	333
	28	33	1167.67	450	15.45	800	395	391	393
	29	33	1167.67	280	12.7	610	381	249	315
	30	33	1167.67	240	19.8	810	417	481	449
	31	33	1167.67	310	17.3	620	468	376	422
	32	33	1167.67	260	22.85	630	559	473	516
	33	33	1167.67	300	17.9	580	367	485	426
	34	33	1167.67	410	11.9	710	273	381	327
	35	33	1167.67	400	14.1	830	364	250	307
	36	33	1167.67	240	25.1	910	481	487	484
	37	33	1167.67	230	18.3	810	306	320	313
	38	33	1167.67	250	17.5	890	414	206	310
	39	33	1167.67	430	23	810	511	336	423.5
	40	33	1167.67	210	16.7	800	419	243	331
	41	33	1167.67	310	23.4	820	542	481	511.5
	42	33	1167.67	260	9.8	510	455	361	408
	43	33	1167.67	380	17.5	640	304	293	298.5
	44	33	1167.67	420	16.5	780	359	527	443
	45	33	1167.67	310	16.3	780	397	356	376.5
	46	33	1167.67	330	15	820	301	309	305
	47	33	1167.67	410	17	720	399	287	343
	48	33	1167.67	310	22.1	870	433	412	422.5
	49	33	1167.67	280	19.15	700	729	413	571
	50	33	1167.67	320	14.2	650	399	253	326
	51	33	1167.67	310	12.6	620	278	330	304
	52	33	1167.67	230	20.8	820	413	564	488.5
	53	33	1167.67	240	19.8	700	447	463	455
	54	33	1167.67	300	10.3	420	276	261	268.5
	55	33	1167.67	230	25	720	504	573	538.5
	56	33	1167.67	330	15	680	303	256	279.5
	57	33	1167.67	380	21.3	790	449	264	356.5
	58	33	1167.67	210	17.1	680	526	299	412.5
	59	33	1167.67	420	19.4	630	410	336	373
	60	33	1167.67	350	19	810	423	407	415
	61	33	1167.67	420	21	820	405	412	408.5
	62	33	1167.67	390	15.7	720	429	332	380.5
	63	33	1167.67	240	14.3	680	373	291	332
	64	33	1167.67	310	18.7	740	432	433	432.5
	65	33	1167.67	400	17.3	790	378	319	348.5
	66	33	1167.67	320	16.7	690	435	445	440
	67	33	1167.67	440	22.1	710	402	403	402.5
	68	33	1167.67	320	14.7	810	367	210	288.5
	69	33	1167.67	380	15.8	720	393	244	318.5
	70	33	1167.67	280	14.8	720	294	273	283.5
	Average value	33	1167.67	351.143	17.3229	766.286	416.114	358.329	387.221
Sample plot	Number	age(a)	Stand density(tree*hm-2)	Branch height (cm)	DBH(cm)	Tree height(cm)	Crown width north-south(cm)	Eastern and Western Crown(cm)	Average crown width(cm)
NMS HD ③	1	33	1100	250	20.9	940	432	296	364
	2	33	1100	320	12.52	710	392	447	419.5
	3	33	1100	390	13.14	840	392	245	318.5
	4	33	1100	420	15.73	830	362	331	346.5
	5	33	1100	210	15.7	800	346	269	307.5
	6	33	1100	530	17.69	920	402	393	397.5
	7	33	1100	400	14.72	640	349	382	365.5
	8	33	1100	340	14.17	720	366	244	305
	9	33	1100	330	12.32	730	243	185	214
	10	33	1100	430	15.23	820	348	302	325
	11	33	1100	440	13.69	780	288	283	285.5
	12	33	1100	330	18.96	800	443	379	411
	13	33	1100	390	16.66	780	429	414	421.5
	14	33	1100	360	15.17	750	357	286	321.5
	15	33	1100	380	13.33	740	366	309	337.5
	16	33	1100	360	18.42	720	518	482	500
	17	33	1100	380	23.54	930	511	675	593
	18	33	1100	410	13.56	620	266	359	312.5
	19	33	1100	410	13.76	800	298	272	285
	20	33	1100	410	19.05	950	511	432	471.5
	21	33	1100	440	13.75	850	268	218	243
	22	33	1100	430	21.73	930	554	551	552.5
	23	33	1100	340	15.68	780	427	381	404
	24	33	1100	320	14.44	760	351	309	330
	25	33	1100	440	17.59	920	402	441	421.5
	26	33	1100	210	14.86	910	342	304	323
	27	33	1100	410	13.57	810	455	326	390.5
	28	33	1100	430	18.28	820	498	492	495
	29	33	1100	230	13.28	690	671	232	451.5
	30	33	1100	380	16.8	910	342	279	310.5
	31	33	1100	380	16.6	880	413	224	318.5
	32	33	1100	260	17.1	870	363	315	339
	33	33	1100	440	15.3	680	339	255	297
	34	33	1100	350	17.56	900	467	344	405.5
	35	33	1100	480	12.9	720	343	263	303
	36	33	1100	430	11.6	770	333	281	307
	37	33	1100	250	18.6	810	342	377	359.5
	38	33	1100	300	17.39	820	436	542	489
	39	33	1100	400	20.72	930	502	581	541.5
	40	33	1100	370	11.72	730	353	315	334
	41	33	1100	360	21.61	890	469	488	478.5
	42	33	1100	420	15.83	850	412	421	416.5
	43	33	1100	410	17.6	820	483	444	463.5
	44	33	1100	260	22.85	630	559	473	516
	45	33	1100	300	17.9	580	367	485	426
	46	33	1100	290	17.32	830	504	404	454
	47	33	1100	250	21.36	900	476	455	465.5
	48	33	1100	320	19.98	830	449	465	457
	49	33	1100	340	17.29	840	515	504	509.5
	50	33	1100	300	12.93	690	269	368	318.5
	51	33	1100	420	15.75	780	304	307	305.5
	52	33	1100	270	13.58	610	554	404	479
	53	33	1100	320	14.2	650	399	253	326
	54	33	1100	280	19.15	700	729	412	570.5
	55	33	1100	310	12.6	620	278	330	304
	56	33	1100	190	16.53	730	459	454	456.5
	57	33	1100	320	15.6	780	508	396	452
	58	33	1100	410	20.9	920	514	401	457.5
	59	33	1100	340	19.72	890	536	417	476.5
	60	33	1100	440	13.72	830	346	291	318.5
	61	33	1100	390	17.64	850	474	387	430.5
	62	33	1100	310	14.87	780	426	372	399
	63	33	1100	210	13.92	620	443	441	442
	64	33	1100	280	14.8	720	294	273	283.5
	65	33	1100	380	15.8	720	393	244	318.5
	66	33	1100	320	17.4	810	367	210	288.5
	Average value	33	1100	351.818	16.3421	790.606	414.348	365.364	389.856

## Sheet: Biomass
density(tree*ha-1)	Number	TB(g)	BB(g)	LB(g)	RB(g)	LTB(g)
483.333	YS①.1	1042.26	995.667	1870.79	1497.2	5405.91
483.333	YS①.2	1058.37	1808.3	2628.82	1497.2	6992.69
550	YS②.1	1483.2	3464.19	5075.65	1476.19	11499.2
550	YS②.2	1056.82	1701.98	3598.36	1476.19	7833.35
550	YS③.1	1332.64	4028.17	4075.41	1805.19	11241.4
550	YS③.2	1705.45	3891.05	5845.56	1805.19	13247.2
588.333	HMS①.1	14356.9	14372.5	8339.33	11410.6	48479.3
588.333	HMS①.2	13033.3	21085	15950.7	11410.6	61479.6
622	HMS②.1	11673.1	15917.5	11350.2	11574.9	50515.7
622	HMS②.2	11998.8	14369.5	9776.59	11574.9	47719.8
608.667	HMS③.1	13795.7	21082.5	12862.2	11919	59659.5
608.667	HMS③.2	17821.8	10845.8	11448.3	11919	52034.9
1266.67	NMS HD①.1	35631.4	18334.8	9497.5	13199.8	76663.5
1266.67	NMS HD①.2	38218.4	17631.6	10481.9	13199.8	79531.8
1166.67	NMS HD②.1	37876.8	18720.2	6423.87	12283.9	75304.8
1166.67	NMS HD②.2	43213.7	23124.6	9695.76	12283.9	88317.9
1100	NMS HD ③.1	45677.2	15386.8	6307.51	17009.3	84380.7
1100	NMS HD ③.2	34917.3	18532.6	11086.1	17009.3	81545.3
816.667	NMS MD ①.1	42141.1	11668.7	8543.02	18279.6	80632.4
816.667	NMS MD ①.2	47841.2	19896.8	11919.8	18279.6	97937.5
783.333	NMS MD ②.1	47017.3	19386.1	14724.1	16008.3	97135.8
783.333	NMS MD ②.2	52363.1	20128.5	14190.6	16008.3	102690
716.667	NMS MD ③.1	36597	20443.2	15991.9	17497.4	90529.5
716.667	NMS MD ③.2	50981.7	16374.1	13465.6	17497.4	98318.9
550	NMS LD ①.1	43361.9	24313.3	13342.4	27142.4	108160
550	NMS LD ①.2	44363.3	26545	13193.8	27142.4	111245
516.667	NMS LD ②.1	35874.5	26545	13193.8	23114.9	98728.1
516.667	NMS LD ②.2	37030.8	16456.9	11107	23114.9	87709.6
450	NMS LD ③.1	44822.8	18531.7	14873.3	29635.5	107863
450	NMS LD ③.2	42019.1	16524.2	12139.2	29635.5	100318
1216.67	MS HD ①.1	57595.3	16744.2	7983.24	20777	103100
1216.67	MS HD ①.2	53185.3	16796.9	6498.86	20777	97258.1
1050	MS HD ②.1	44744.6	23402.9	6156.1	20852.3	95155.8
1050	MS HD ②.2	55376.8	15109	6141.71	20852.3	97479.8
1016.67	MS HD ③.1	46492.5	22038.2	9194.62	20557.1	98282.5
1016.67	MS HD ③.2	49271.5	15367.8	5720.87	20557.1	90917.2
688	MS MD ①.1	79857.8	25613	7564.58	27600.8	140636
688	MS MD ①.2	68794.3	17634.2	10337	27600.8	124366
648	MS MD ②.1	75843	30582.9	6011.97	26871	139309
648	MS MD ②.2	60204	30582.9	6011.97	26871	123670
633	MS MD ③.1	63888	19770.1	8236.01	28434.9	120329
633	MS MD ③.2	63391.2	19770.1	8236.01	28434.9	119832
341	MS LD ①.1	96972	48769.1	15286.6	34235.7	195263
341	MS LD ①.2	105582	66623.1	19175.6	34235.7	225616
311	MS LD ②.1	92363.2	34952.8	12408	35828	175552
311	MS LD ②.2	103702	38641.1	10854.6	35828	189025
318	MS LD ③.1	90604.7	61982.2	14261.4	33990.7	200839
318	MS LD ③.2	100658	43491	20071.3	33990.7	198211
266.667	OMS ①.1	157848	32690.8	14801.7	37320.9	242662
266.667	OMS ①.2	132447	45492.1	9257.49	37320.9	224517
233.333	OMS ②.1	134927	43382.1	17155.6	37534.1	232999
233.333	OMS ②.2	147638	36642.3	19188.8	37534.1	241003
233.333	OMS③.1	156587	38257.9	7293.28	46064.6	248202
233.333	OMS③.2	194680	39411.3	10473.2	46064.6	290629

## Sheet: carbon content
density(tree*ha-1)	Number	TC(g)	BC(g)	LC(g)	RC(g)	LTC(g)
483.333	YS①.1	591.25	682.35	604.21	472.08	579.509
550	YS②.1	594.66	641.78	596.73	442.74	590.266
550	YS③.1	588.76	607.24	588.88	411.48	566.957
588.333	HMS①.1	591.25	557.8	610.64	459.81	560.413
622	HMS②.1	632.74	542.1	598.2	432.95	549.909
608.667	HMS③.1	550.08	573.54	622.98	486.11	561.307
550	NMS LD ①.1	594.67	544.396	578.39	508.486	559.733
516.667	NMS LD ②.1	710.539	566.899	563.069	536.735	616.367
450	NMS LD ③.1	690.43	563.548	640.156	524.286	616.05
688	MS MD ①.1	489.63	489.56	540.28	463.52	487.217
648	MS MD ②.1	497.56	467.53	563.01	417.56	480.987
633	MS MD ③.1	496.24	450.67	548.34	401.17	470.146
266.667	OMS ①.1	632.74	527.16	550.41	387.46	575.771
233.333	OMS ②.1	598.58	534.88	573.34	395.38	552.127
233.333	OMS③.1	600.81	553.76	498.24	352.03	544.372
